# Supplementary material
Source: PubMed Central journal article supplement (PMC2704587)

## Supplementary Information

### List of Figures

**Figure S1.** Effect of endothelial cell-conditioned medium on fibrinogen secretion on day 4 of culture. A) Endothelial cell-conditioned medium induces a dose-dependant increase in hepatocyte fibrinogen secretion. B) Fibrinogen secretion by hepatocytes embedded in collagen gel (3D) compared to hepatocytes seeded on top of a collagen gel (2D) during continuous stimulation with 75% endothelial-cell conditioned medium.

**Figure S2.** Proline levels in supernatant of hepatocytes in co-culture with endothelial cells as compared to those in monoculture. Cells were exposed continuously to the control medium.

**Figure S3.** (A) Albumin and (B) fibrinogen secretion profiles of hepatocytes embedded in collagen and exposed to proline (20  $\mu\text{g/ml}$ ) supplemented control medium.

**Figure S4.** Albumin secretion on day 4 by hepatocytes embedded in collagen gel. A) Cells were exposed to control medium supplemented with different doses of HGF, IL6, TNF  $\alpha$ . The results were normalized with respect to hepatocytes exposed to control medium. B) Cells were exposed to conditioned (75%) or control (0%) medium supplemented with MMP-3 (330 ng/ml). The results are normalized with respect to hepatocytes treated with conditioned medium. (\*\*  $P < 0.01$  compared to conditioned medium, ##  $P < 0.01$  compared to control medium)

**Figure S5.** Albumin secretion on day 4 by hepatocytes cultured on top of collagen gel (2D configuration). Hepatocytes were treated with conditioned medium (75%), control medium (0%), proline (20  $\mu\text{g/ml}$ ) supplemented in control medium or cis-hydroxyproline (HP: 40  $\mu\text{g/ml}$ ) supplemented in conditioned medium. The results were normalized with respect to hepatocytes exposed to conditioned medium.

Figure S1

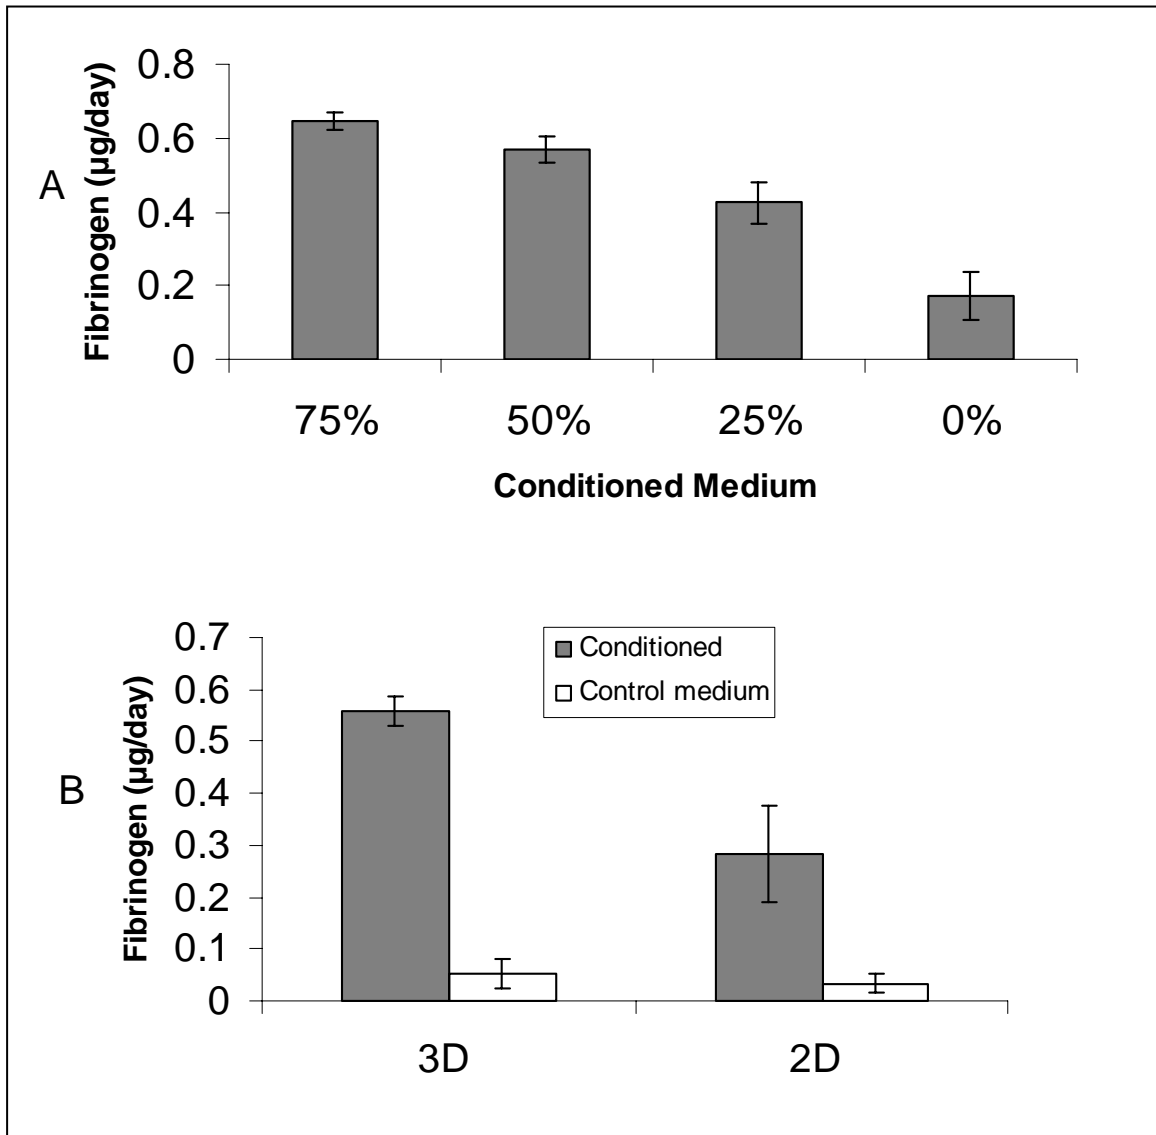

Figure S2

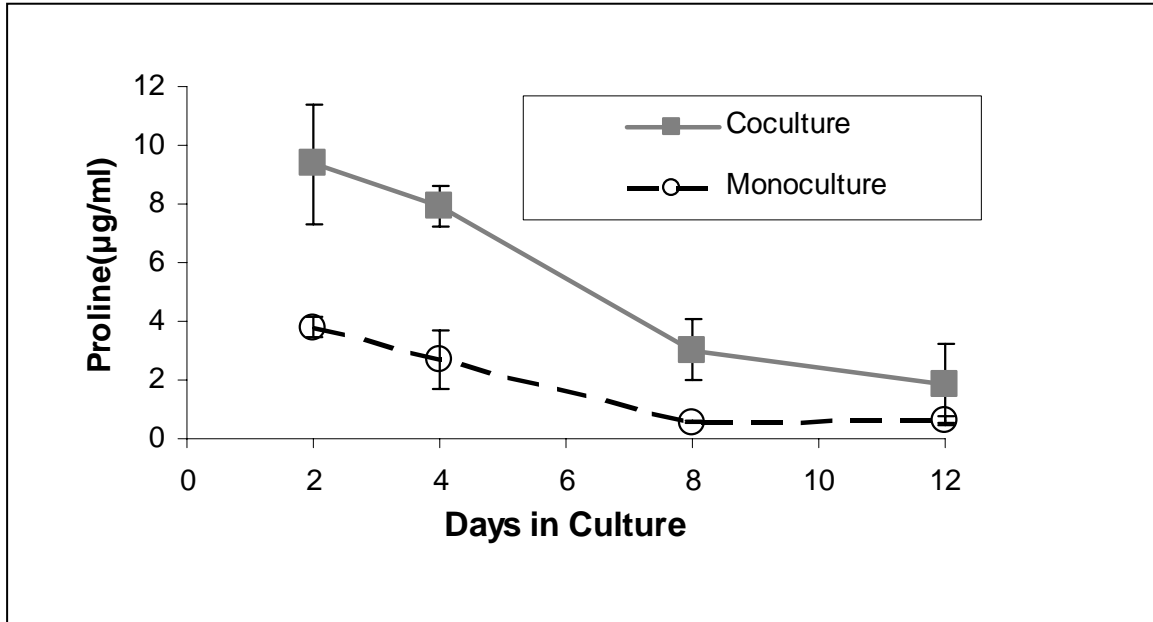

Figure S3

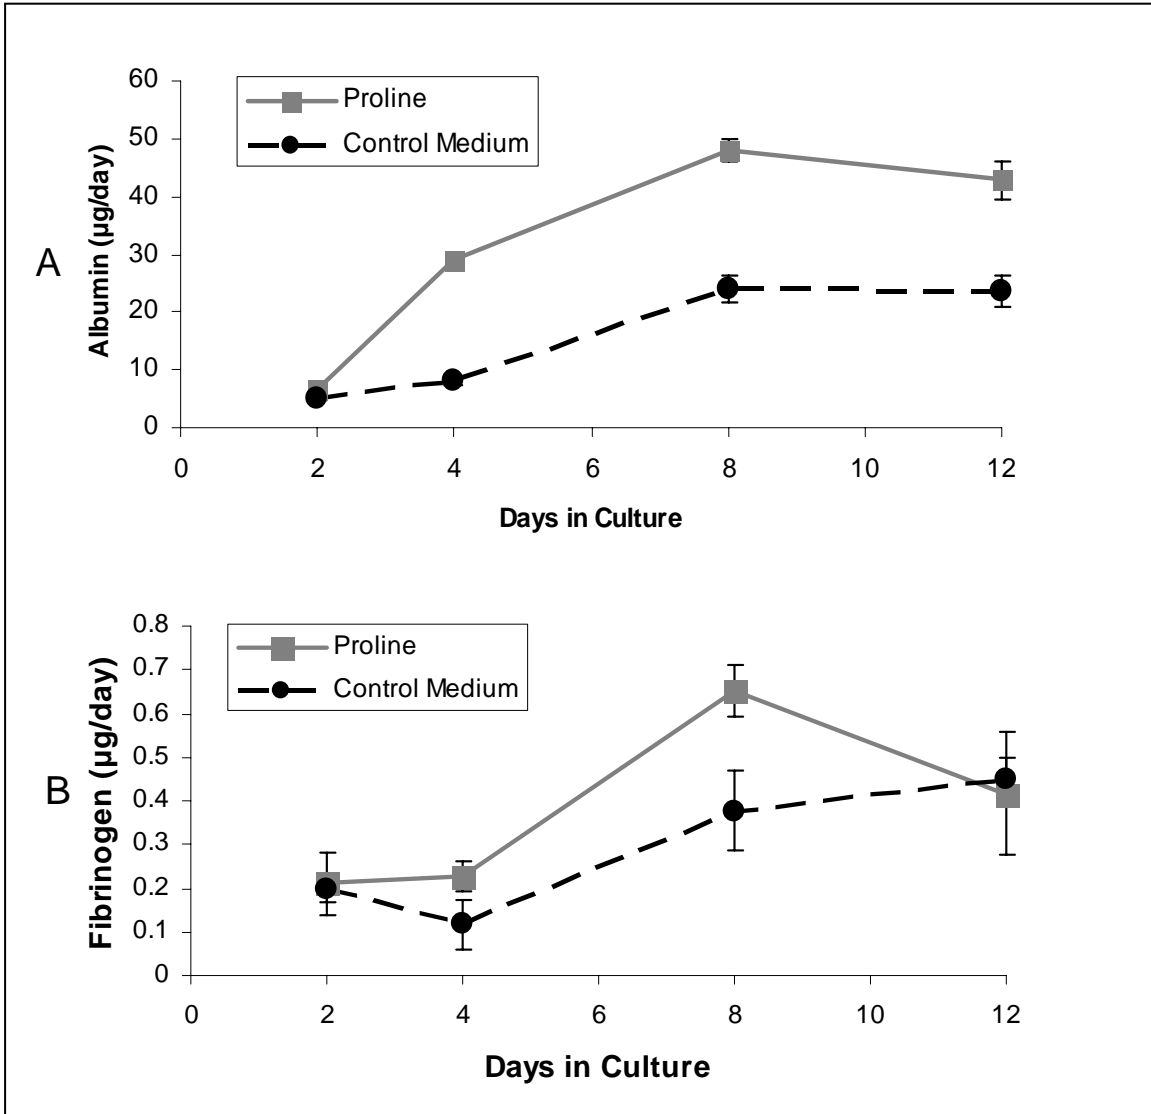

Figure S4

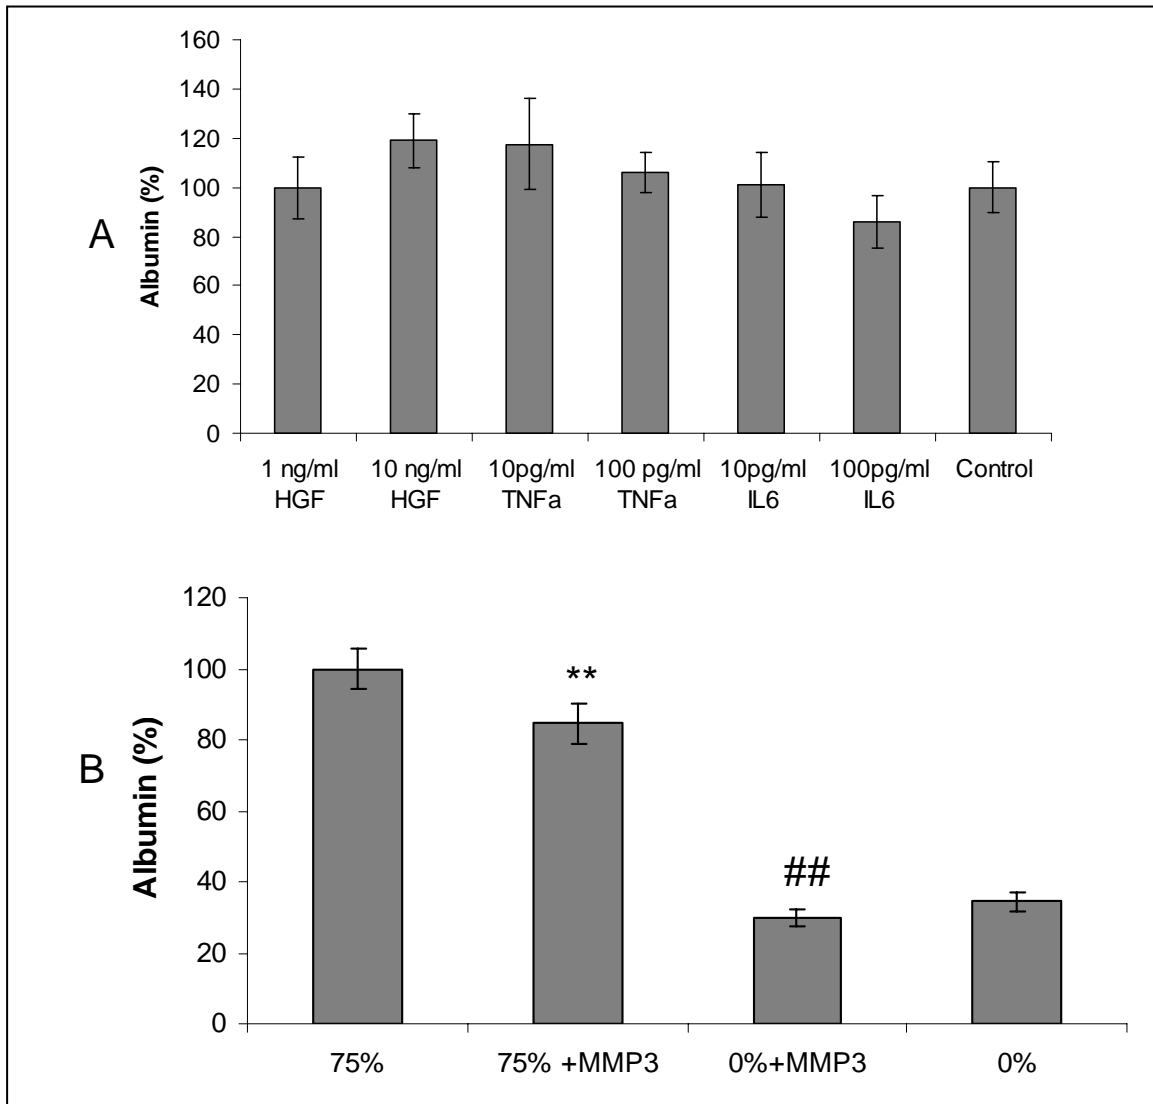

**Figure S5**

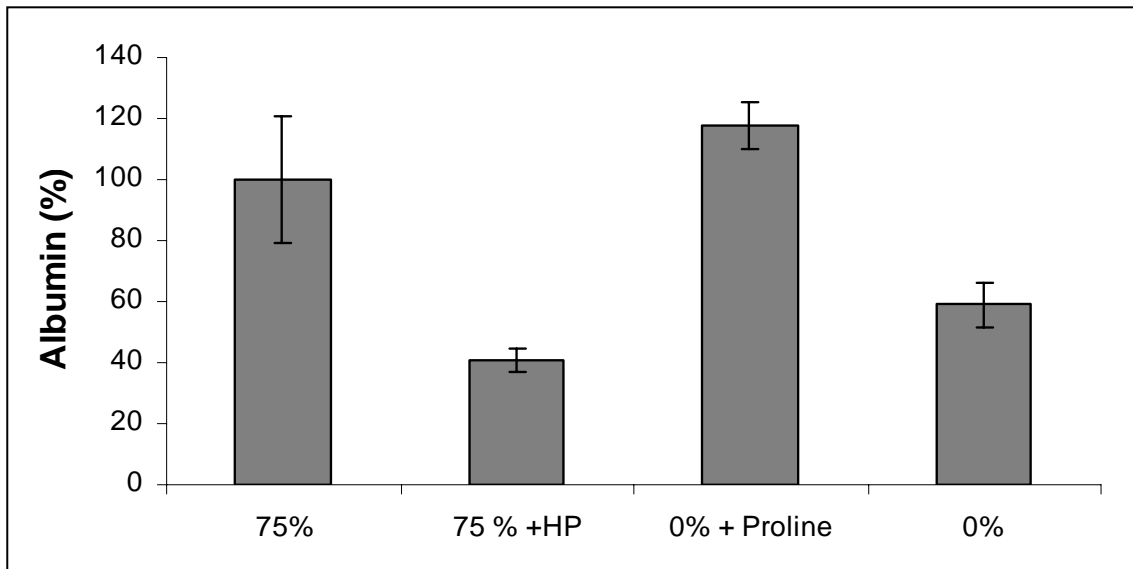

Supplement: fj.08-114934_1.pdf [file fj.08-114934_1.pdf]
